# Supplementary material
Source: Springer Nature journal article supplement (https://www.springermedizin.de/resource/supplementary/12913_2011_1793_MOESM2_ESM.pdf/9528962)

**The Government of  
the Hong Kong Special  
Administrative Region  
of the People's  
Republic of China**

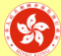

*Median net  
consultation fee with  
a private GP:  
US\$19 – 26*

Reimbursement for  
healthcare voucher  
through electronic  
payment system

5 electronic vouchers of US\$6  
annually (US\$30 total)

**Year 2009-2011**

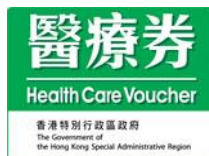

**Healthcare  
Professionals in  
Private Sector\***

(Could enroll or withdraw  
at anytime in 2009-2011)

**Older People  
aged ≥ 70 years**

Do not need to register/  
pre-register/ collect / carry  
the vouchers; just need to  
inform the participating  
healthcare providers that  
they want to use vouchers

\* **Enrolled** – with **Scheme Logo** at  
their location(s) of practice

(✓ - covered services; ✗ uncovered services)

- ✓ Medical Practitioners
- ✓ Chinese Medicine Practitioners
- ✓ Dentists
- ✓ Chiropractors
- ✓ Nurses, Enrolled Nurses
- ✓ Physiotherapists
- ✓ Occupational Therapists
- ✓ Radiographers
- ✓ Medical Laboratory Technologists
- ✗ Purchasing drugs and medicine
- ✗ Public services subsidized by the Government (Inpatients & Outpatient)

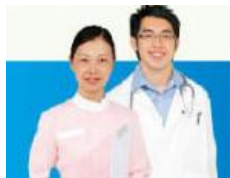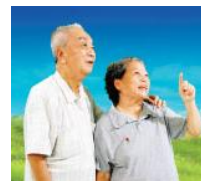

Supplement: MOESM2 [file 9528962]
